# Supplementary material
Source: publisher site journal article supplement (http://www.dovepress.com/get_supplementary_file.php?f=287464.docx)
Supplement: Supplementary file 1 [file get_supplementary_file.php]

**Supplementary materials**


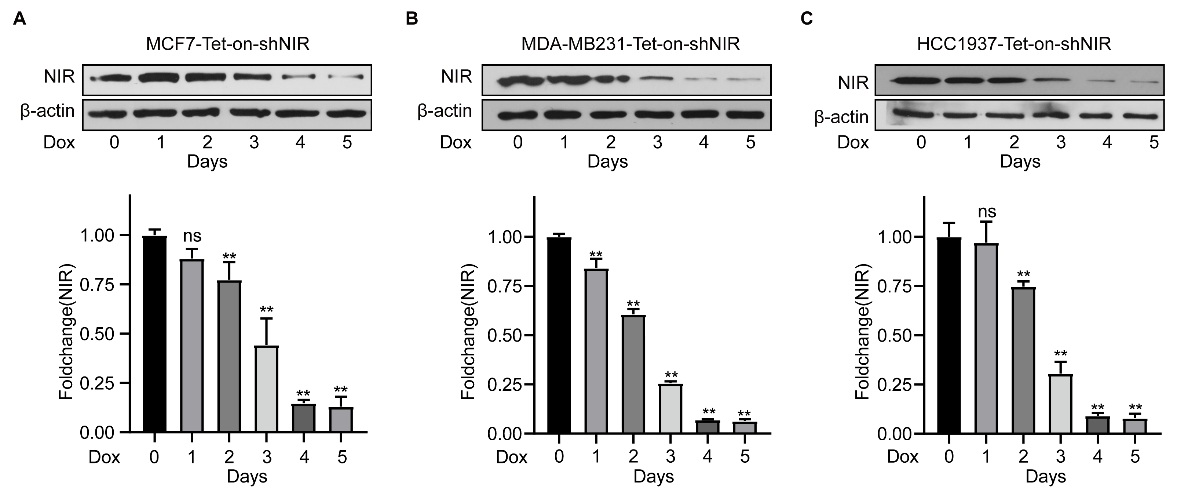


**Figure S1.** NIR expression time-course was detected by Western blot in MCF7-tet-on-shNIR **(A)**, MDA-MB231-tet-on-shNIR **(B)** and HCC1937-tet-on-shNIR **(C)**, cells, after Dox treatment for 0, 1, 2, 3, 4, 5 days, separately. The Western blot images were analyzed by Image J (NIH, USA). The statistical difference was performed by one-way analysis of variance (ANOVA) test and the data presented as mean ± SD from three independent experiments. β-actin was used as an internal control, compared with the control group, * p < 0.05, ** p < 0.01; ns as no significant difference.
